# Supplementary material
Source: PubMed Central journal article supplement (PMC6150642)
Supplement: am8b08830_si_001.pdf [file am8b08830_si_001.pdf]

## Supporting information

### **Catalyst Support Effect on the Activity and Durability of Magnetic Nanoparticles: toward Design of Advanced Electrocatalyst for Full Water Splitting**

Fatemeh Davodi <sup>1</sup>, Elisabeth Mühlhausen <sup>2</sup>, Mohammad Tavakkoli <sup>1</sup>, Jani Sainio <sup>3</sup>, Hua Jiang <sup>3</sup>, Bilal Gökce <sup>2</sup>, Galina Marzun <sup>2</sup>, Tanja Kallio <sup>\*1</sup>

---

<sup>1</sup> F. Davodi, Dr. M. Tavakkoli, Prof. T. Kallio

Electrochemical Energy Conversion Group, Department of Chemistry and Materials Science, School of Chemical Engineering, Aalto University, P.O. Box 16100, FI-00076 Aalto, Finland.

Email: [tanja.kallio@aalto.fi](mailto:tanja.kallio@aalto.fi)

<sup>2</sup> E. Mühlhausen, Dr. G. Marzun, Dr. B. Gökce

University of Duisburg-Essen, Technical Chemistry I and Center for Nanointegration Duisburg-Essen (CENIDE), Universitätsstr. 7, 45141 Essen, Germany

<sup>3</sup> Dr. J. Sainio, Dr. H. Jiang

Department of Applied Physics, School of Science, Aalto University, P.O. Box 15100, FI 00076 Aalto, Finland.

### Calculation of electrochemically active surface area

The electrochemical capacitance was calculated by measuring double layer capacitance of Ni@ $\gamma$ -Fe<sub>2</sub>O<sub>3</sub>/ES-MWNT on a glassy carbon RDE in 1 M NaOH as described earlier.<sup>3</sup> To measure the double layer capacitance, the cyclic voltammograms (CVs) were plotted at different scan rates in a potential range where no Faradaic process occurred (Fig. S7a) and charging currents ( $i_c$ ) at different scan rates were measured. From the slope of  $i_c$  as a function of scan rate ( $\nu$ ), the double layer capacitance ( $C_{DL}$ ) was obtained (Fig. S7b) based on the following eq. 1:

$$i_c = \nu C_{DL} \quad (1)$$

The  $C_{DL}$  of Ni@ $\gamma$ -Fe<sub>2</sub>O<sub>3</sub>/ES-MWNT measured by the above-mentioned method is ~ 1.38 mF. The electrochemically active surface area (ECAS) can be obtained from eq 2:

$$ECAS = C_{DL}/C_s \quad (2)$$

Where  $C_s$  is the specific capacitance. The average  $C_s$  of 0.040 mF cm<sup>-2</sup> in 0.1 M NaOH was used for the calculation of the ECAS based on previous reports<sup>3</sup> in alkaline solution. As a result, an ECAS of 35 cm<sup>2</sup> was obtained for the Ni@ $\gamma$ -Fe<sub>2</sub>O<sub>3</sub>/ES-MWNT catalyst.

### Estimation of the Faradaic efficiency

The experiments were performed in a rotating ring-disk electrode (RRDE) configuration. The Pt-ring electrode was set at 0.4 V vs. RHE to allow the O<sub>2</sub> produced on the disk during the anodic scans to be reduced, via 4 electrons, to OH<sup>-</sup>, according to equation (3):

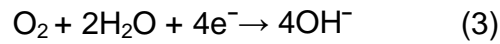

The faradaic efficiency ( $\epsilon\%$ ) was calculated using the expression for the collection efficiency of the RRDE given in eq 4:

$$\epsilon\% = \frac{j_{ring}}{N * j_{disk}} * 100 \quad (4)$$

Where  $j_{\text{ORR}}$  and  $j_{\text{OER}}$  are current densities measured on the Pt ring and the GC disk, respectively, and  $N$  is the collection efficiency (here ~0.2) of the RRDE.

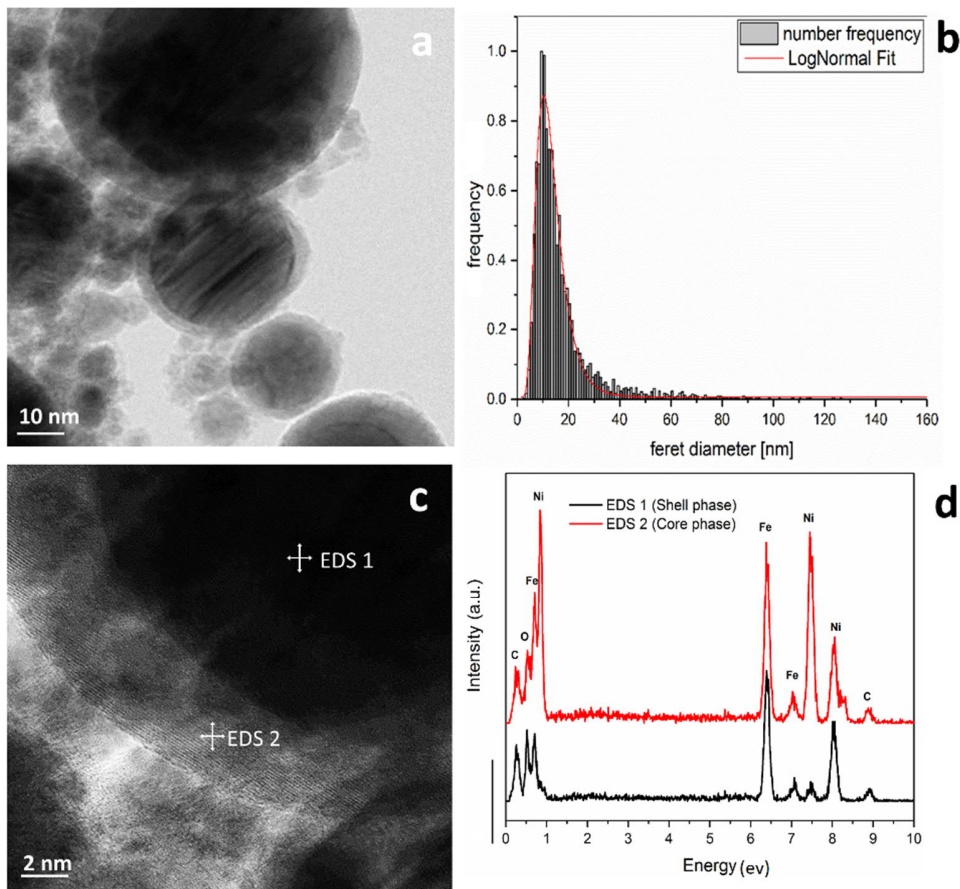

**Figure S1.** (a) TEM images obtained from the Ni@ $\gamma$ -Fe<sub>2</sub>O<sub>3</sub> nanoparticles, (b) Particle size distribution of the Ni@ $\gamma$ -Fe<sub>2</sub>O<sub>3</sub> nanoparticles received from the TEM images. The average diameter obtained from the LogNormal fit is 12.3 nm, (c) HR-TEM image of an isolated Ni@ $\gamma$ -Fe<sub>2</sub>O<sub>3</sub> particle showing the interface of the core (Ni) and shell ( $\gamma$ -Fe<sub>2</sub>O<sub>3</sub>) in the particle, and (d) corresponding EDS spectra from the particle, showing elemental compositions of the shell and the core.

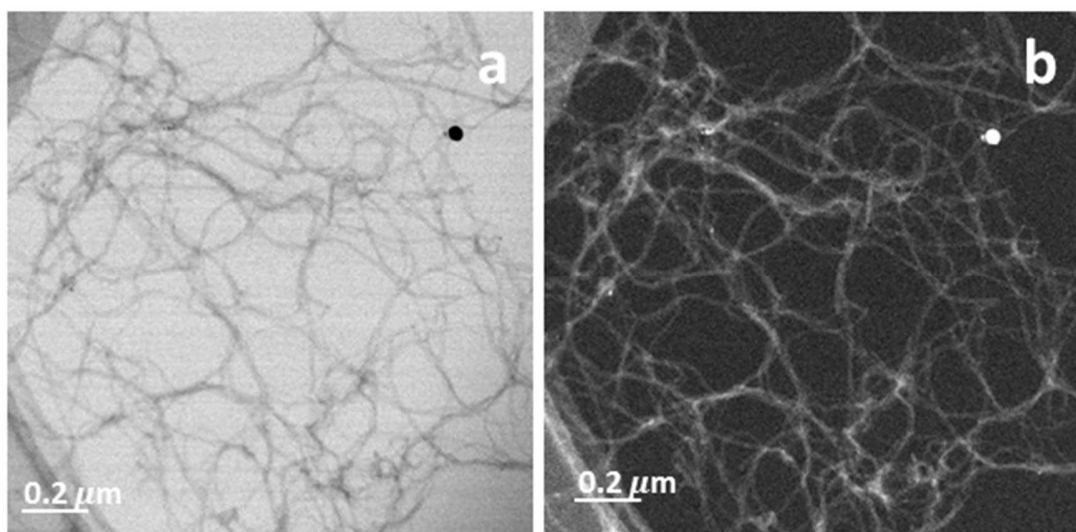

**Figure S2.** (a) STEM and corresponding (b) HAAD-STEM images obtained from MWNTs (without ES functionalization) mixed with the Ni@ $\gamma$ -Fe<sub>2</sub>O<sub>3</sub> particles, showing very sparse dispersion of the particles on MWNTs in the absence of the ES polymer.

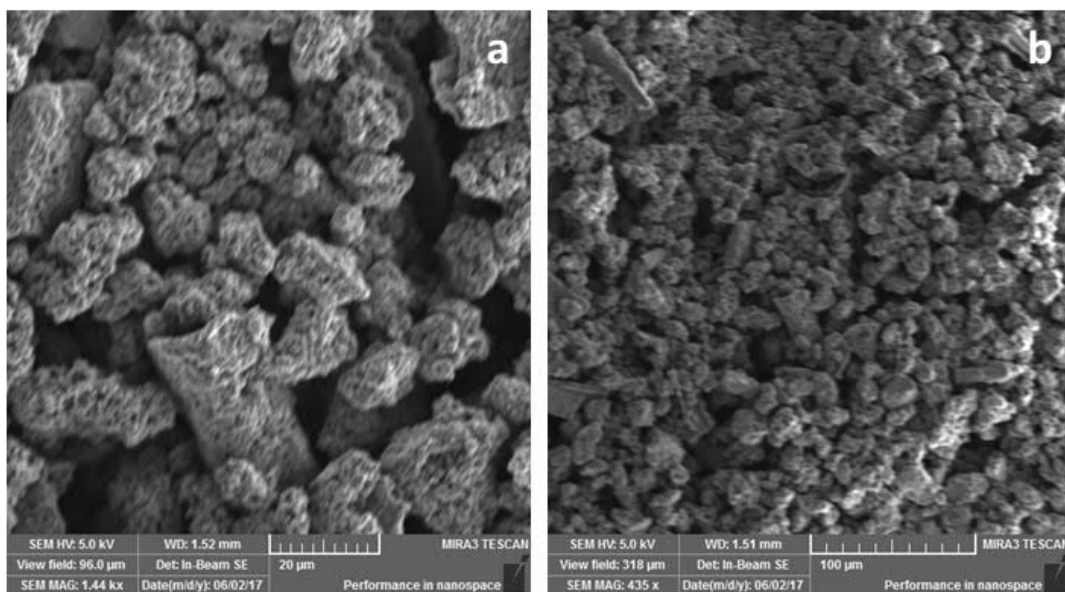

**Figure S3.** (a) A high-resolution and (b) low resolution scanning electron microscopy images of the Ni@ $\gamma$ -Fe<sub>2</sub>O<sub>3</sub> nanoparticles mixed with emeraldine salt polymer.

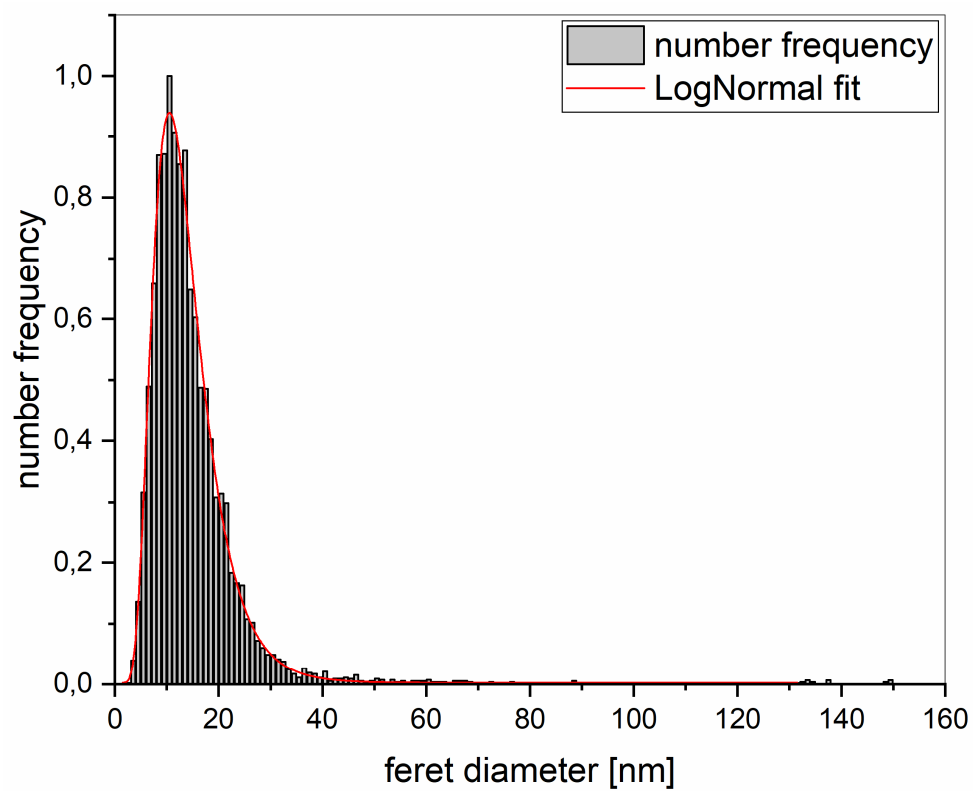

**Figure S4.** Particle size distribution of the FeO<sub>x</sub> nanoparticles received from the TEM images. The average diameter obtained from the LogNormal fit is 12.5 nm.

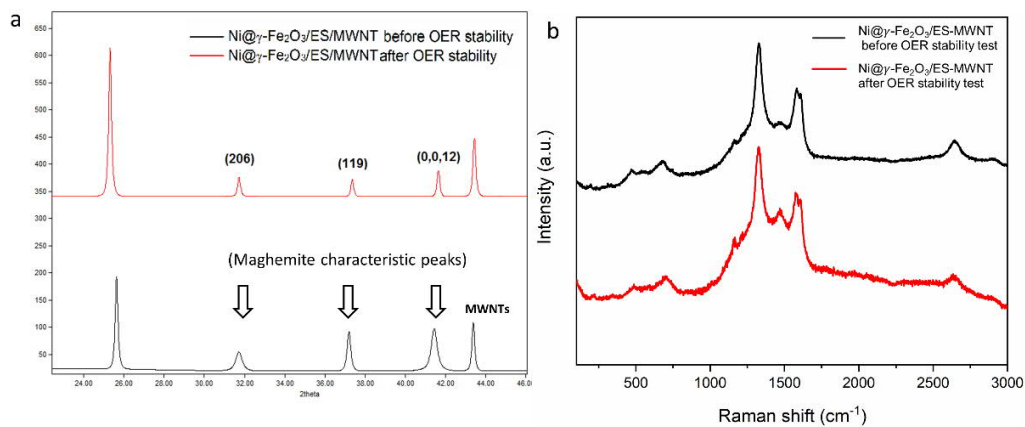

**Figure S5.** (a) XRD and (b) Raman spectra of Ni@ $\gamma$ -Fe<sub>2</sub>O<sub>3</sub>/ES-MWNT before (black line) and after (red line) of the 5,000 OER cycles.



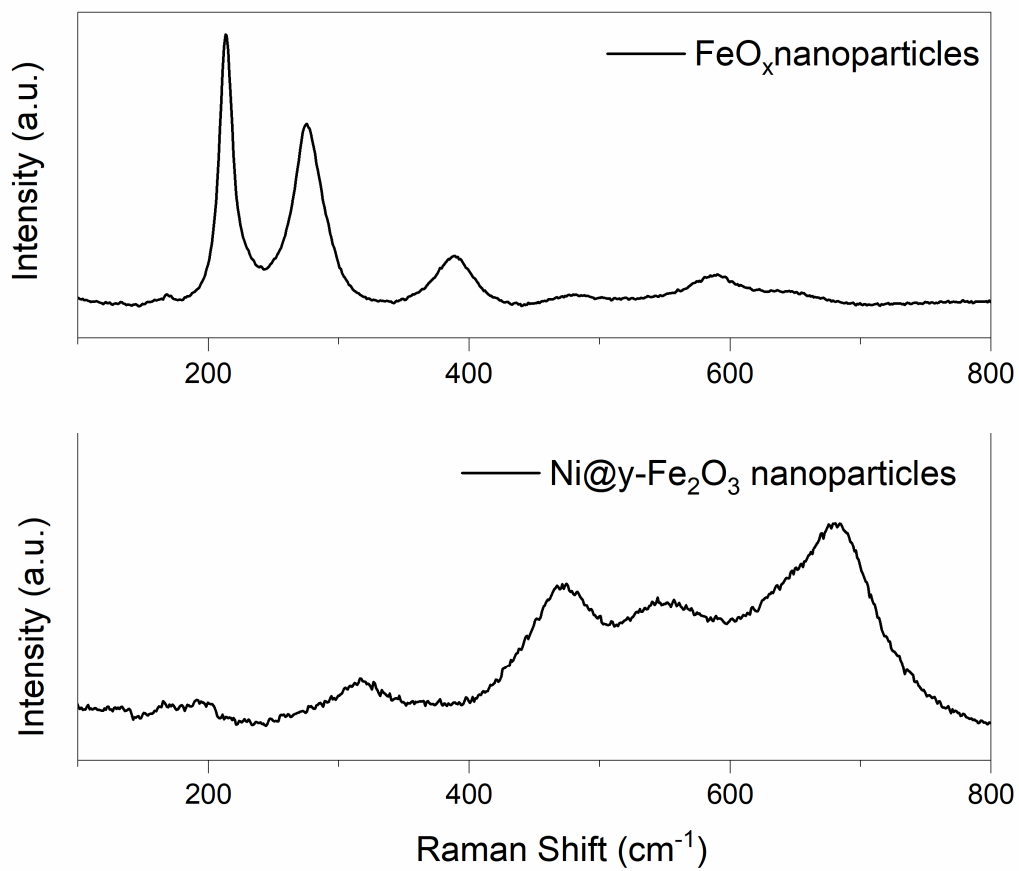

**Figure S6.** Raman spectra of  $\text{FeO}_x$  NPs (above) and  $\text{Ni}@\gamma\text{-Fe}_2\text{O}_3$  NPs (below), showing hematite and maghemite Raman features, respectively.

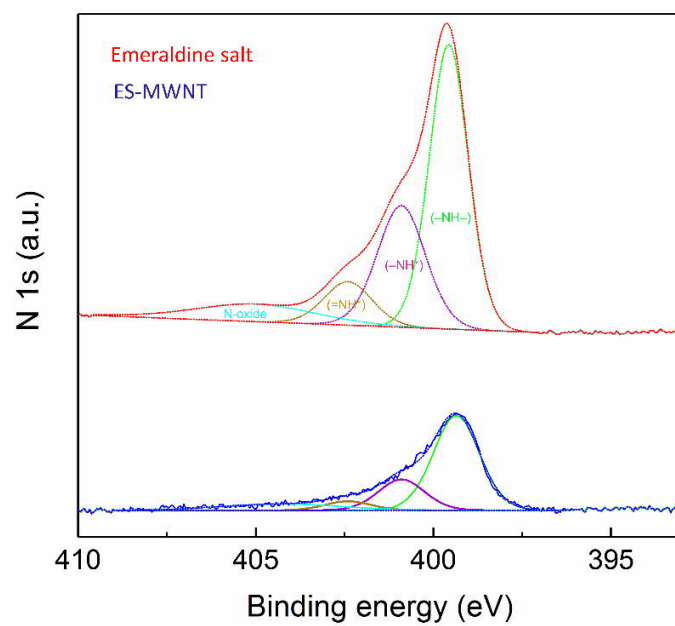

**Figure S7.** X-ray photoelectron spectra of N 1s obtained from emeraldine salt and MWNT-ES. Deconvoluted components shown: amine (green line), protonated amine (purple line), protonated imine (yellow line) and N-oxide (light blue line).

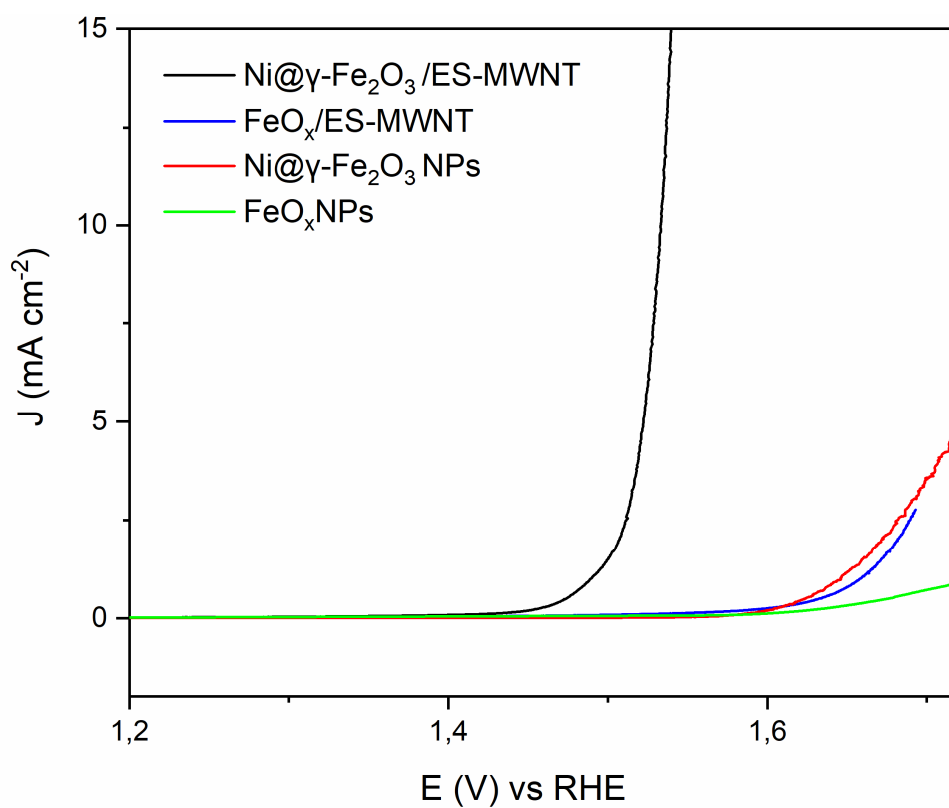

**Figure S8.** IR-corrected RDE polarization curves obtained with the FeO<sub>x</sub> NPs (green line), Ni@ $\gamma$ -Fe<sub>2</sub>O<sub>3</sub> NPs (red line), FeO<sub>x</sub>/ES-MWNT (blue line) and Ni@ $\gamma$ -Fe<sub>2</sub>O<sub>3</sub>/ES-MWNT (black line) in 0.1 M NaOH solution. The curves were measured at a scan rate of 5 mV s<sup>-1</sup> and a rotation speed of 1600 rpm.

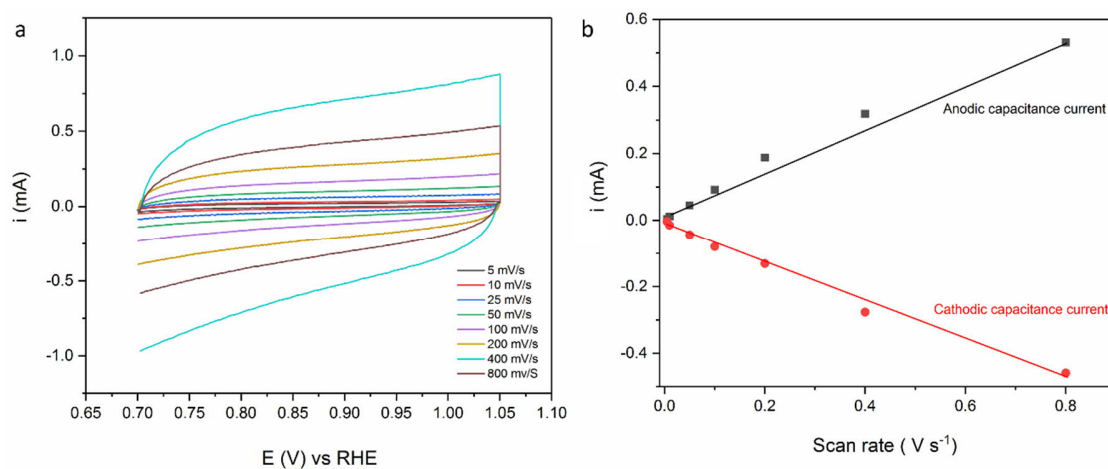

**Figure S9.** Double-layer capacitance measurements for the Ni@ $\gamma$ -Fe<sub>2</sub>O<sub>3</sub>/ES-MWNT catalyst from cyclic voltammetry in 1 M NaOH. **(a)** Cyclic voltammograms of the Ni@ $\gamma$ -Fe<sub>2</sub>O<sub>3</sub>/ES-MWNT electrode recorded in a non-faradaic region (0.7 - 1.05 V vs. RHE) at scan rates of 5, 10, 25, 50, 100, 200, 400, and 800 mV. The working electrode was held at each potential for 20 s before beginning of the next sweep. Current in this graph was assumed to be induced only by capacitive charging/discharging. **(b)** The cathodic (red circle) and anodic (black square) capacitance currents measured at 0.95 V vs. RHE are plotted as a function of the scan rate. The double-layer capacitance of this system is calculated as the average of the absolute value of the slope of the linear fits to the data (see the equations above).

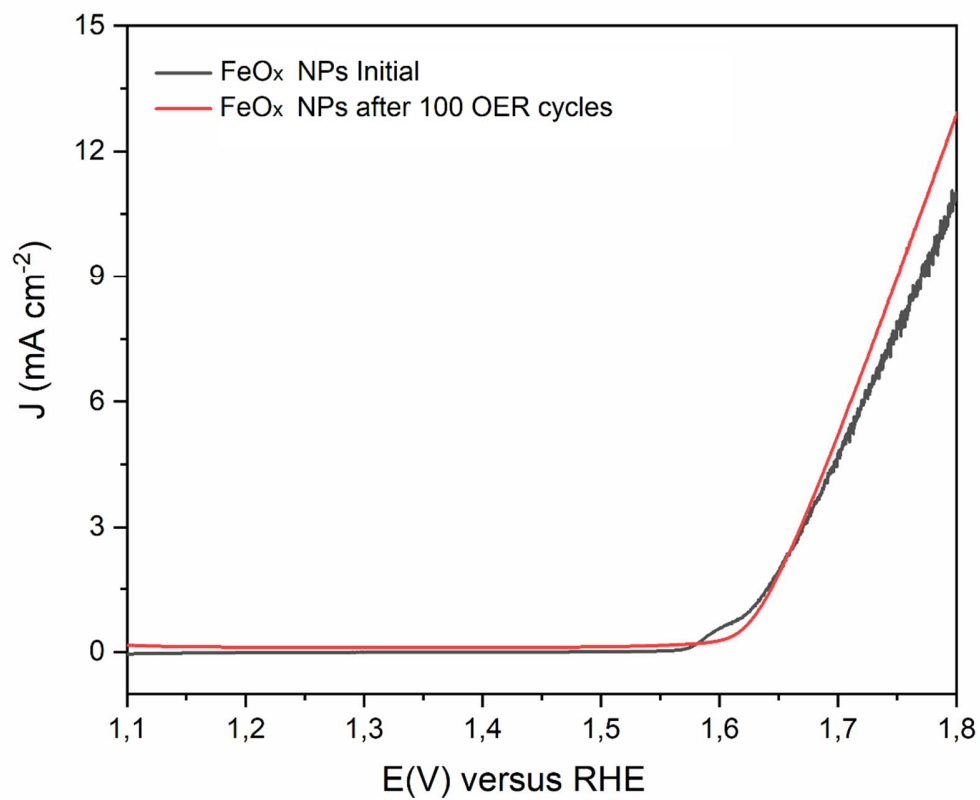

**Figure S10.** OER polarization curves of the FeO<sub>x</sub> NPs before (red solid line) and after (black line) 100 stability cycles between 1 and 1.75 V vs RHE at a scan rate of 50 mV s<sup>-1</sup> in 0.1 NaOH,

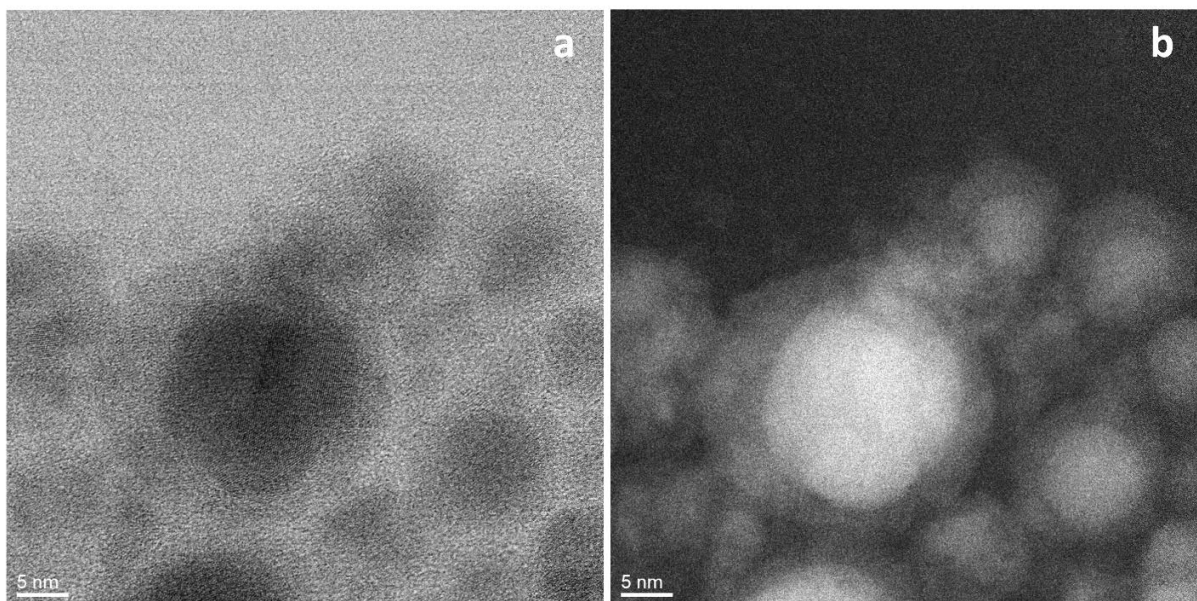

**Figure S11.** Structural and elemental analysis of Ni@ $\gamma$ -Fe<sub>2</sub>O<sub>3</sub> after electrochemical stability measurements. (a) STEM and corresponding (b) HAAD-STEM images of the Ni@ $\gamma$ -Fe<sub>2</sub>O<sub>3</sub> core-shell NPs.

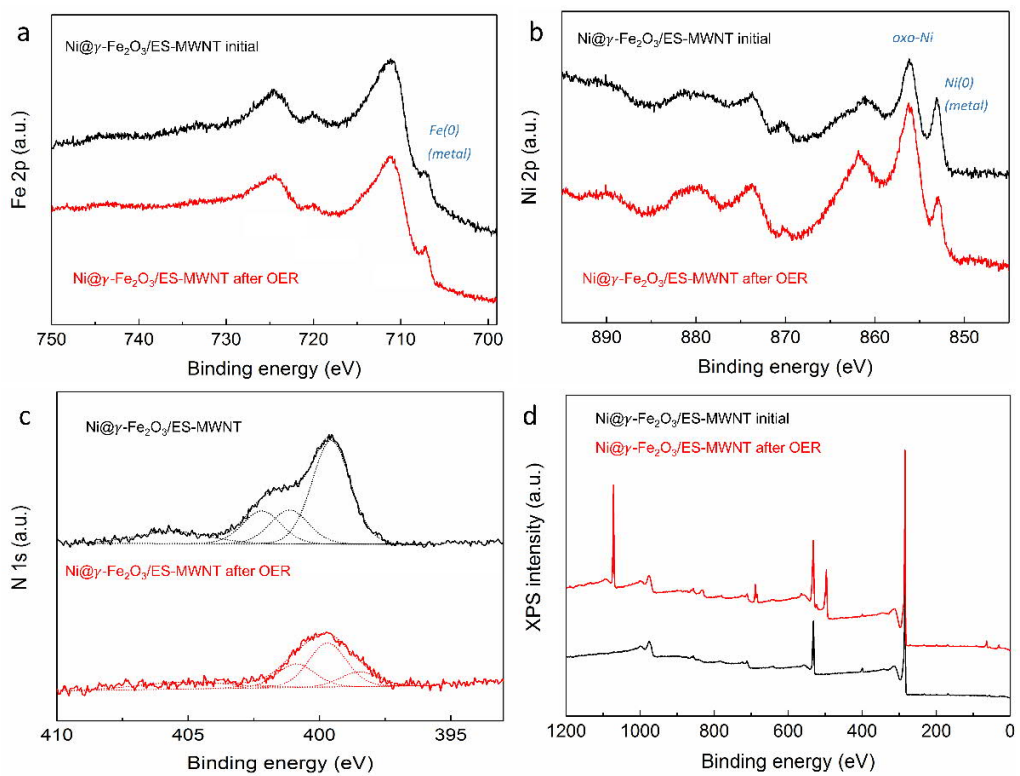

**Figure S12.** (a) Fe 2p, (b) Ni 2p, (c) N 1s and (d) survey XPS spectra of the Ni@ $\gamma$ -Fe<sub>2</sub>O<sub>3</sub>/ES-MWNT catalyst before and after the 5,000 OER cycles.

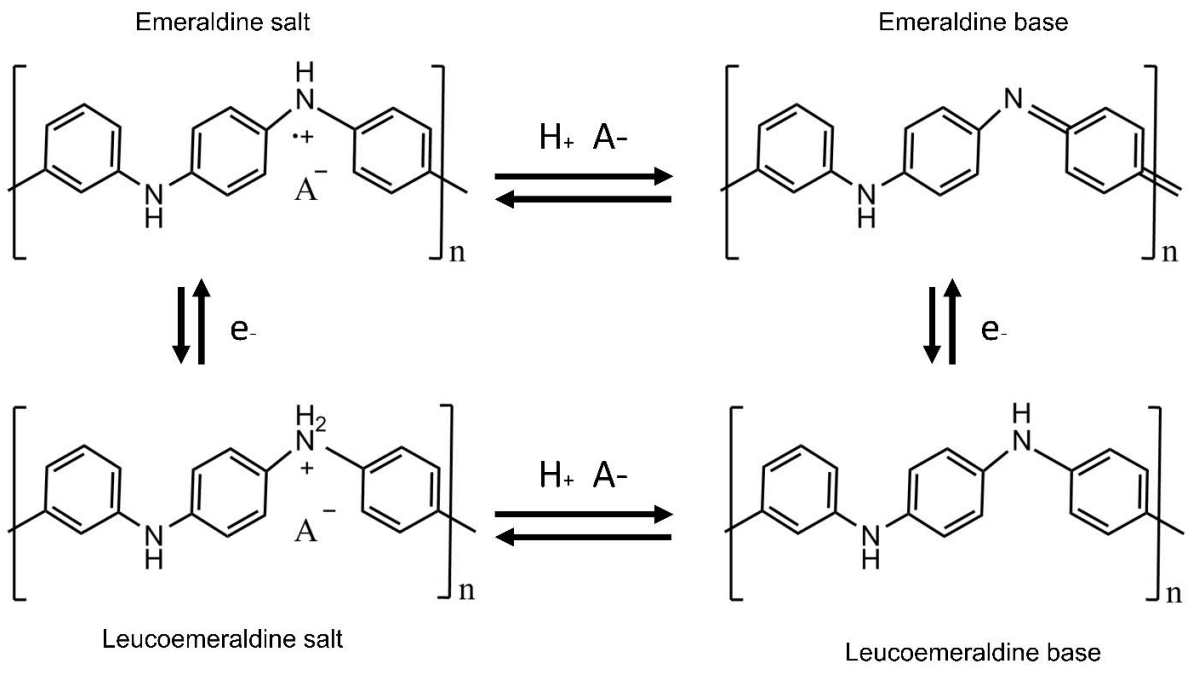

**Figure S13.** Different chemical structures of polyaniline emeraldine salt.



**Table S1** The atomic percentages of the different elements of Ni@ $\gamma$ -Fe<sub>2</sub>O<sub>3</sub>/ES-MWNT (before and after the stability measurements), emeraldine salt (ES), and the ES-MWNT composite as derived from XPS. The error bar associated with atomic percentage is of the order of  $\pm 10\%$  of the value. Note that for the Ni@ $\gamma$ -Fe<sub>2</sub>O<sub>3</sub>/ES-MWNT sample tested for the OER, Nafion was used as binder. Therefore, the presence of Nafion on the Ni@ $\gamma$ -Fe<sub>2</sub>O<sub>3</sub>/ES-MWNT after the OER can underestimate the real N/C ratio.

| Catalyst                                                                           | Ni<br>(at-%) | Fe<br>(at-%) | N<br>(at-%) | C<br>(at-%) | S<br>(at-%) | F<br>(at-%) | O<br>(at-%) | Na<br>(at-%) | Cl<br>(at-%) |
|------------------------------------------------------------------------------------|--------------|--------------|-------------|-------------|-------------|-------------|-------------|--------------|--------------|
| Emeraldine salt                                                                    | -            | -            | 7.28        | 79.7        | 2.72        | 0.49        | 9.80        | -            | -            |
| ES-MWNT                                                                            | -            | -            | 1.42        | 94.7        | 0.46        | 0.14        | 3.20        | 0.03         | 0.05         |
| Ni@ $\gamma$ -Fe <sub>2</sub> O <sub>3</sub> /ES-MWNT                              | 0.40         | 0.54         | 1.54        | 84.2        | 0.36        | 0.05        | 12.8        | 0.04         | 0.04         |
| Ni@ $\gamma$ -Fe <sub>2</sub> O <sub>3</sub> /ES-MWNT after stability measurements | 0.48         | 0.42         | 0.48        | 75.6        | 0.25        | 3.54        | 14.4        | 4.72         | 0.14         |

**Table S2** The percentages of different nitrogen species of all nitrogen for Ni@ $\gamma$ -Fe<sub>2</sub>O<sub>3</sub>/ES/MWNT (before and after the OER stability measurements), ES, and ES-MWNT composite as derived from peak fitting of the N 1s XPS region (BE = binding energy).

| catalyst                                                                       | imine<br>(=N-)<br>BE ~ 398.5<br>eV | amine<br>(-NH-)<br>BE ~ 399.5<br>eV | protonated<br>amine<br>(-NH <sub>2</sub> <sup>+</sup> )<br>BE ~ 401.1<br>eV | protonated<br>imine<br>(=NH <sup>+</sup> )<br>BE ~ 402.2 eV | N-oxide<br>BE ~ 404-406<br>eV |
|--------------------------------------------------------------------------------|------------------------------------|-------------------------------------|-----------------------------------------------------------------------------|-------------------------------------------------------------|-------------------------------|
| Emeraldine salt                                                                | -                                  | 52                                  | 28                                                                          | 10                                                          | 10                            |
| ES-MWNT                                                                        | -                                  | 62                                  | 21                                                                          | 6                                                           | 11                            |
| Ni@ $\gamma$ -Fe <sub>2</sub> O <sub>3</sub> /ES-<br>MWNT                      | -                                  | 54                                  | 17                                                                          | 17                                                          | 12                            |
| Ni@ $\gamma$ -Fe <sub>2</sub> O <sub>3</sub> /ES-<br>MWNT after<br>measurments | 15                                 | 43                                  | 23                                                                          | 3                                                           | 16                            |

**Table S3** Comparison of OER performance of the Ni@ $\gamma$ -Fe<sub>2</sub>O<sub>3</sub>/ES-MWNT catalyst to the state-of-the-art OER material, so far reported  $\gamma$ -Fe<sub>2</sub>O<sub>3</sub> containing electrocatalyst and core-shell metal@Fe<sub>x</sub>O reported electrocatalyst.

| Catalyst                                              | Electrolyte | $\eta_{\text{onset}}$<br>(mV) | $\eta$ (mV)<br>@<br>10 mA cm <sup>-2</sup> | Tafel slope<br>(mV dec <sup>-1</sup> ) | Mass<br>loading<br>(mg cm <sup>-2</sup> ) | Substrate | Reference |
|-------------------------------------------------------|-------------|-------------------------------|--------------------------------------------|----------------------------------------|-------------------------------------------|-----------|-----------|
| Ni@ $\gamma$ -Fe <sub>2</sub> O <sub>3</sub> /ES-MWNT | 0.1 M NaOH  | 250                           | 290                                        | 45                                     | 0.2                                       | GC        | This work |
|                                                       | 1 M NaOH    | 200                           | 260                                        |                                        |                                           |           |           |
| $\gamma$ -Fe <sub>2</sub> O <sub>3</sub> /CNT         | 0.1 M NaOH  | 340                           | 410                                        | 50                                     | 0.2                                       | GC        | 3<br>2016 |
|                                                       | 1 M NaOH    | 320                           | 560                                        |                                        |                                           |           |           |
| $\gamma$ -Fe <sub>2</sub> O <sub>3</sub> @NCNT        | 0.1M KOH    | 370                           | 450                                        | 53                                     | N.A                                       | CP        | 4<br>2016 |
| NiFe-LDH<br>state-of-the-art                          | 0.1M KOH    | 280                           | 300                                        | 35                                     | 0.25                                      | GC        | 5<br>2013 |
|                                                       | 1M KOH      | 220                           | 240                                        |                                        |                                           |           |           |
| Au@CoFeO <sub>x</sub>                                 | 1M KOH      | 260                           | 350                                        | N.A                                    | N.A                                       | GC        | 6<br>2017 |
| Ni-bipy-MWCNT                                         | 0.1 M NaOH  | 290                           | 310                                        | 35                                     | 0.2                                       | GC        | 7<br>2017 |
|                                                       | 1 M NaOH    | 260                           | 290                                        |                                        |                                           |           |           |

## References:

- 1 S. Barcikowski, T. Baranowski, Y. Durmus, U. Wiedwald and B. Gökce, *J. Mater. Chem. C*, 2015, **3**, 10699–10704.
- 2 X. Yan, Z. Han, Y. Yang and B. Tay, *J. Phys. Chem. C*, 2007, **3**, 4125–4131.
- 3 M. Tavakkoli, T. Kallio, O. Reynaud, A. G. Nasibulin, J. Sainio, H. Jiang, E. I. Kauppinen and K. Laasonen, *J. Mater. Chem. A Mater. energy Sustain.*, 2016, **4**, 5216–5222.
- 4 T. Sharifi, W. L. Kwong, H. M. Berends, C. Larsen, J. Messinger and T. Wågberg, *Int. J. Hydrogen Energy*, 2016, **41**, 69–78.
- 5 M. Gong, Y. Li, H. Wang, Y. Liang, J. Z. Wu, J. Zhou, J. Wang, T. Regier, F. Wei and H. Dai, *J. Am. Chem. Soc.*, 2013, **135**, 8452–8455.
- 6 A. L. Strickler, M. Escudero-Escribano and T. F. Jaramillo, *Nano Lett.*, 2017, **17**, 6040–6046.
- 7 M. Tavakkoli, M. Nosek, J. Sainio, F. Davodi, T. Kallio, P. M. Joensuu and K. E. Laasonen, *ACS Catal.*, 2017, **7**, 8033–8041.
